# Supplementary material
Source: PubMed Central journal article supplement (PMC8261616)
Supplement: NIHMS1641131-supplement-Supplementary_Material.pdf [file NIHMS1641131-supplement-Supplementary_Material.pdf]

# Supplementary Material - Adults and children predict in complex and variable referential contexts

## Contents

|                                                         |           |
|---------------------------------------------------------|-----------|
| <b>Abstract</b>                                         | <b>2</b>  |
| <b>Experiment 1</b>                                     | <b>3</b>  |
| Mixed Effects Models . . . . .                          | 3         |
| Cluster-Based Permutation Analyses . . . . .            | 4         |
| Results by Age Group . . . . .                          | 5         |
| <b>Experiment 2</b>                                     | <b>6</b>  |
| Mixed Effects Models . . . . .                          | 6         |
| Cluster-Based Permutation Analyses . . . . .            | 7         |
| Results by Age Group . . . . .                          | 7         |
| Mixed Effects Models by Predictive Cue . . . . .        | 8         |
| Results by Predictive Cue . . . . .                     | 9         |
| Results by Halves . . . . .                             | 10        |
| Results by First Predictive Occurrence . . . . .        | 12        |
| Results by Chronological Trial . . . . .                | 13        |
| <b>Experiment 3</b>                                     | <b>14</b> |
| Mixed Effects Models . . . . .                          | 14        |
| Cluster-Based Permutation Analyses . . . . .            | 15        |
| Results by Age Group . . . . .                          | 15        |
| Mixed Effects Models by Predictive Cue . . . . .        | 16        |
| Results by Predictive Cue . . . . .                     | 17        |
| Experiment 2 Results vs. Experiment 3 Results . . . . . | 18        |

# Abstract

Prior research suggests that prediction supports language processing and learning. However, the ecological validity of such findings is unclear because experiments usually include constrained stimuli. While theoretically suggestive, previous conclusions will be largely irrelevant if listeners cannot generate predictions in response to complex and variable perceptual input. Taking a step toward addressing this limitation, three eye-tracking experiments evaluated how adults ( $N = 72$ ) and 4- and 5-year-old children ( $N = 72$ ) generated predictions in contexts with complex visual stimuli (Experiment 1), variable speech stimuli (Experiment 2), and both concurrently (Experiment 3). Results indicated that listeners generated predictions in contexts with complex visual stimuli or variable speech stimuli. When both were more naturalistic, listeners used informative verbs to generate predictions, but not adjectives or number markings. This investigation provides a test for theories claiming that prediction is a central learning mechanism, and calls for further evaluations of prediction in naturalistic settings.

# Experiment 1

## Mixed Effects Models

The omnibus mixed effects model includes an interaction of age (adults vs. children), condition (predictive vs. neutral), and time (-1000 to 1000 ms from noun onset; 100 ms time-bins), with random intercepts for subjects and for items. We find...

| term                   | estimate | statistic | p.value | sig |
|------------------------|----------|-----------|---------|-----|
| Intercept              | 0.298    | 0.91      | 0.379   |     |
| Condition              | -0.477   | -13.87    | < 0.001 | *   |
| Age                    | 0.328    | 3.83      | < 0.001 | *   |
| Time                   | 1.243    | 22.41     | < 0.001 | *   |
| Condition x Age        | 0.038    | 1.12      | 0.262   |     |
| Condition x Time       | -0.170   | -3.07     | 0.002   | *   |
| Age x Time             | 0.344    | 6.21      | < 0.001 | *   |
| Condition x Age x Time | 0.140    | 2.53      | 0.012   | *   |

For adults, we find:

| term             | estimate | statistic | p.value | sig |
|------------------|----------|-----------|---------|-----|
| Intercept        | 0.623    | 2.22      | 0.049   | *   |
| Condition        | -0.429   | -9.12     | < 0.001 | *   |
| Time             | 1.589    | 20.66     | < 0.001 | *   |
| Condition x Time | -0.029   | -0.38     | 0.707   |     |

For children, we find:

| term             | estimate | statistic | p.value | sig |
|------------------|----------|-----------|---------|-----|
| Intercept        | 0.020    | 0.05      | 0.962   |     |
| Condition        | -0.513   | -10.28    | < 0.001 | *   |
| Time             | 0.896    | 11.15     | < 0.001 | *   |
| Condition x Time | -0.302   | -3.76     | < 0.001 | *   |

## Cluster-Based Permutation Analyses

To further evaluate differences in looking behavior between predictive trials and neutral trials, we used cluster-based permutation analyses (Maris & Oostenveld, 2007). We analyzed looking behavior during a time window from 1000 ms before and after the onset of the target noun. If participants used informative cues to predict the upcoming target noun, then we expected them to generate anticipatory eye movements towards the target referent before it is named, thus having greater target looks for predictive trials as compared to neutral trials. We calculated participants' mean proportion of looks to the target referent within each 100-ms time bin and performed a log-odds transformation on these proportions (Bar, 2008; Wittenberg, Khan & Snedeker, 2017). For each 100-ms time bin, we conducted a linear regression analysis on the log-odds of looking to the target referent, identified clusters of time bins (defined as 2 or more adjacent time bins with  $t$ -values greater than 1.6, as in Wittenberg, Khan & Snedeker, 2017), and summed  $t$ -values within each cluster. Next, we permuted the data to create the null distribution: We randomly shuffled condition labels 1000 times for each time bin, sampling across all time bins, and repeated the cluster-finding procedure and summation of  $t$ -values with this permuted data. Finally, we calculated the  $p$ -value for each cluster, defined as the proportion of permuted cluster  $t$ -values that were greater than the observed cluster  $t$ -value. The below tables summarize results for adults and children, respectively.

| start | end | cluster.stat | pval    |
|-------|-----|--------------|---------|
| -600  | 800 | 41.68923     | < 0.001 |

| start | end  | cluster.stat | pval    |
|-------|------|--------------|---------|
| -300  | 1000 | 39.45939     | < 0.001 |

# Results by Age Group

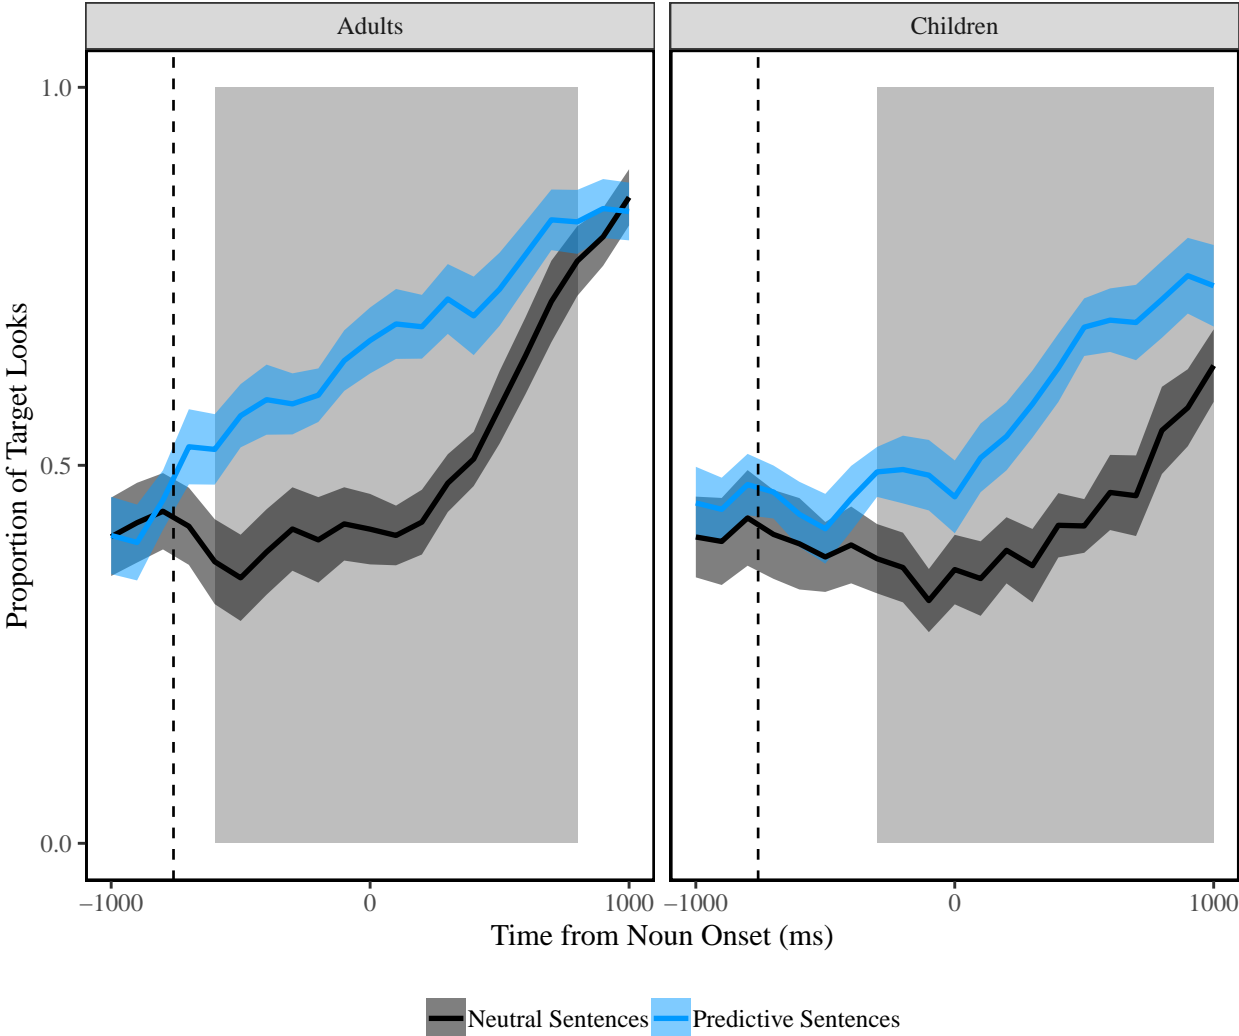

## Experiment 2

### Mixed Effects Models

As in Experiment 1, the omnibus mixed effects model includes an interaction of age (adults vs. children), condition (predictive vs. neutral), and time (-1000 to 1000 ms from noun onset; 100 ms time-bins), with random intercepts for subjects and for items. We find...

| term                   | estimate | statistic | p.value | sig |
|------------------------|----------|-----------|---------|-----|
| Intercept              | 1.365    | 11.75     | < 0.001 | *   |
| Condition              | -0.401   | -21.69    | < 0.001 | *   |
| Age                    | 0.252    | 4.36      | < 0.001 | *   |
| Time                   | 1.771    | 57.96     | < 0.001 | *   |
| Condition x Age        | -0.035   | -1.89     | 0.058   |     |
| Condition x Time       | 0.258    | 8.46      | < 0.001 | *   |
| Age x Time             | 0.450    | 14.74     | < 0.001 | *   |
| Condition x Age x Time | 0.011    | 0.37      | 0.709   |     |

For adults, we find: (Note, the maximal model for adults - including random intercepts for both subjects and items - failed to converge. We therefore reduced the random effects structure and compared model fits, with the final model including only random intercepts for items.)

| term             | estimate | statistic | p.value | sig |
|------------------|----------|-----------|---------|-----|
| Intercept        | 1.608    | 11.67     | < 0.001 | *   |
| Condition        | -0.440   | -19.08    | < 0.001 | *   |
| Time             | 2.221    | 58.24     | < 0.001 | *   |
| Condition x Time | 0.270    | 7.07      | < 0.001 | *   |

For children, we find:

| term             | estimate | statistic | p.value | sig |
|------------------|----------|-----------|---------|-----|
| Intercept        | 1.114    | 8.65      | < 0.001 | *   |
| Condition        | -0.363   | -12.24    | < 0.001 | *   |
| Time             | 1.317    | 26.91     | < 0.001 | *   |
| Condition x Time | 0.250    | 5.11      | < 0.001 | *   |

## Cluster-Based Permutation Analyses

As in Experiment 1, we used cluster-based permutation analyses to further evaluate looking behavior. The below tables summarize results for adults and children, respectively.

| start | end | cluster.stat | pval    |
|-------|-----|--------------|---------|
| -1000 | 600 | 77.15396     | < 0.001 |

| start | end | cluster.stat | pval    |
|-------|-----|--------------|---------|
| -1000 | 500 | 54.29502     | < 0.001 |

## Results by Age Group

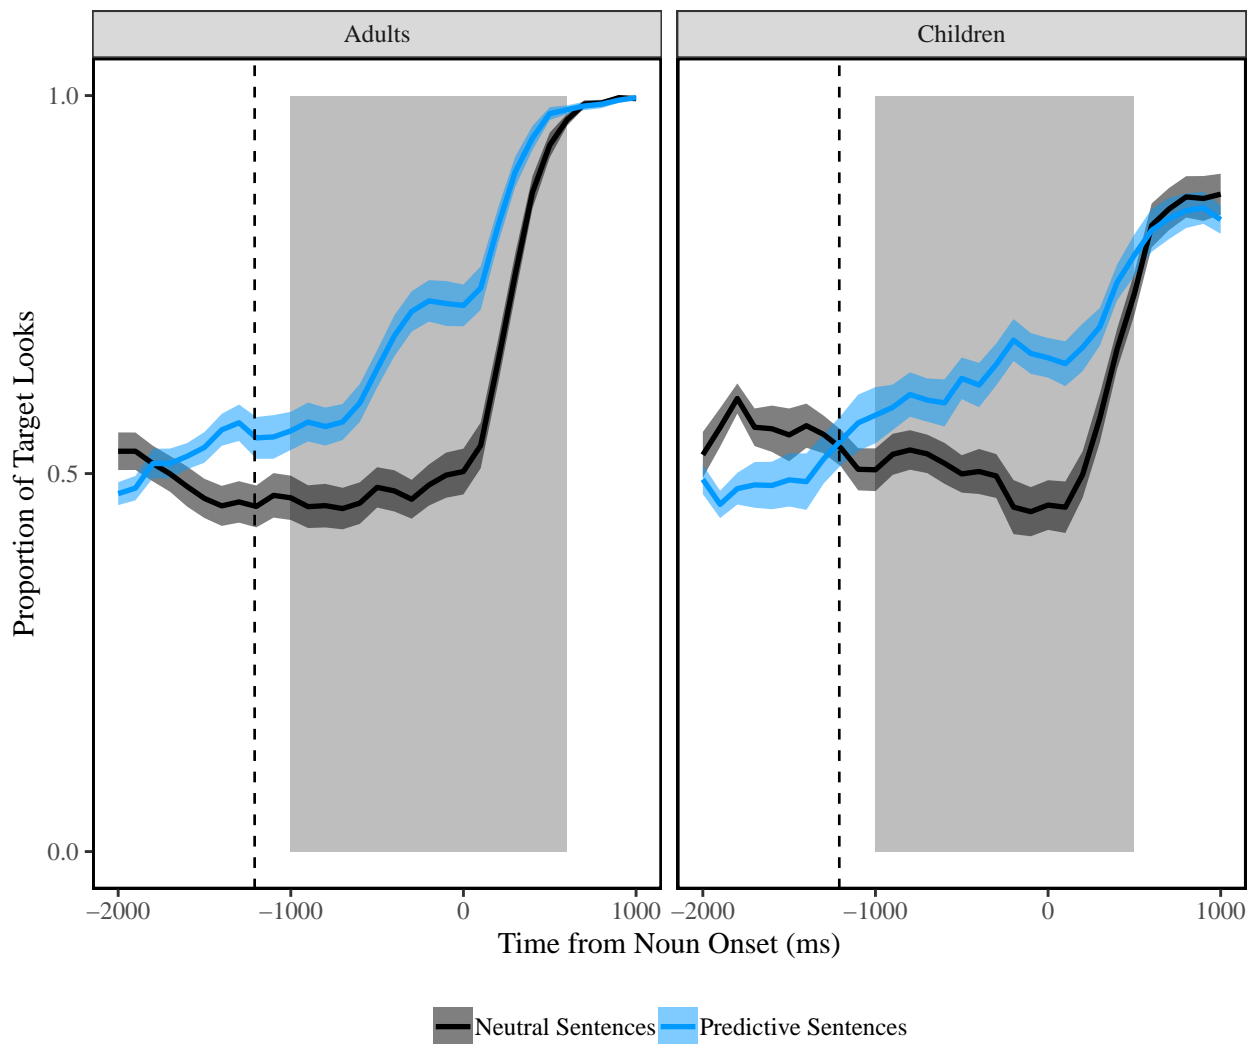

## Mixed Effects Models by Predictive Cue

| term             | estimate | statistic | p.value | sig | age.group | comparison |
|------------------|----------|-----------|---------|-----|-----------|------------|
| Intercept        | -0.082   | -0.27     | 0.791   |     | Adults    | verb       |
| Conditon         | 2.361    | 10.59     | < 0.001 | *   | Adults    | verb       |
| Time             | 0.258    | 1.53      | 0.125   |     | Adults    | verb       |
| Condition x Time | 1.781    | 4.73      | < 0.001 | *   | Adults    | verb       |
| Intercept        | -0.079   | -0.26     | 0.8     |     | Adults    | is/are     |
| Conditon         | 1.511    | 6.75      | < 0.001 | *   | Adults    | is/are     |
| Time             | 0.258    | 1.53      | 0.127   |     | Adults    | is/are     |
| Condition x Time | 0.642    | 1.69      | 0.09    |     | Adults    | is/are     |
| Intercept        | -0.069   | -0.25     | 0.804   |     | Adults    | that/those |
| Conditon         | 1.547    | 6.96      | < 0.001 | *   | Adults    | that/those |
| Time             | 0.258    | 1.50      | 0.134   |     | Adults    | that/those |
| Condition x Time | 1.320    | 3.51      | < 0.001 | *   | Adults    | that/those |
| Intercept        | -0.082   | -0.27     | 0.787   |     | Adults    | big/little |
| Conditon         | 2.098    | 9.54      | < 0.001 | *   | Adults    | big/little |
| Time             | 0.251    | 1.48      | 0.139   |     | Adults    | big/little |
| Condition x Time | 1.400    | 3.76      | < 0.001 | *   | Adults    | big/little |
| Intercept        | -0.189   | -0.70     | 0.489   |     | Children  | verb       |
| Conditon         | 2.249    | 9.21      | < 0.001 | *   | Children  | verb       |
| Time             | -0.382   | -1.97     | 0.049   | *   | Children  | verb       |
| Condition x Time | 1.181    | 2.85      | 0.004   | *   | Children  | verb       |
| Intercept        | -0.237   | -1.08     | 0.287   |     | Children  | is/are     |
| Conditon         | 1.233    | 4.93      | < 0.001 | *   | Children  | is/are     |
| Time             | -0.397   | -1.98     | 0.048   | *   | Children  | is/are     |
| Condition x Time | 0.878    | 2.09      | 0.037   | *   | Children  | is/are     |
| Intercept        | -0.174   | -0.71     | 0.482   |     | Children  | that/those |
| Conditon         | 1.115    | 4.14      | < 0.001 | *   | Children  | that/those |
| Time             | -0.370   | -1.85     | 0.065   |     | Children  | that/those |
| Condition x Time | 0.590    | 1.29      | 0.197   |     | Children  | that/those |
| Intercept        | -0.193   | -0.69     | 0.495   |     | Children  | big/little |
| Conditon         | 1.264    | 4.94      | < 0.001 | *   | Children  | big/little |
| Time             | -0.369   | -1.87     | 0.062   |     | Children  | big/little |
| Condition x Time | 1.355    | 3.14      | 0.002   | *   | Children  | big/little |



## Results by Predictive Cue

(Grey shading indicates significant clusters from permutation analyses.)

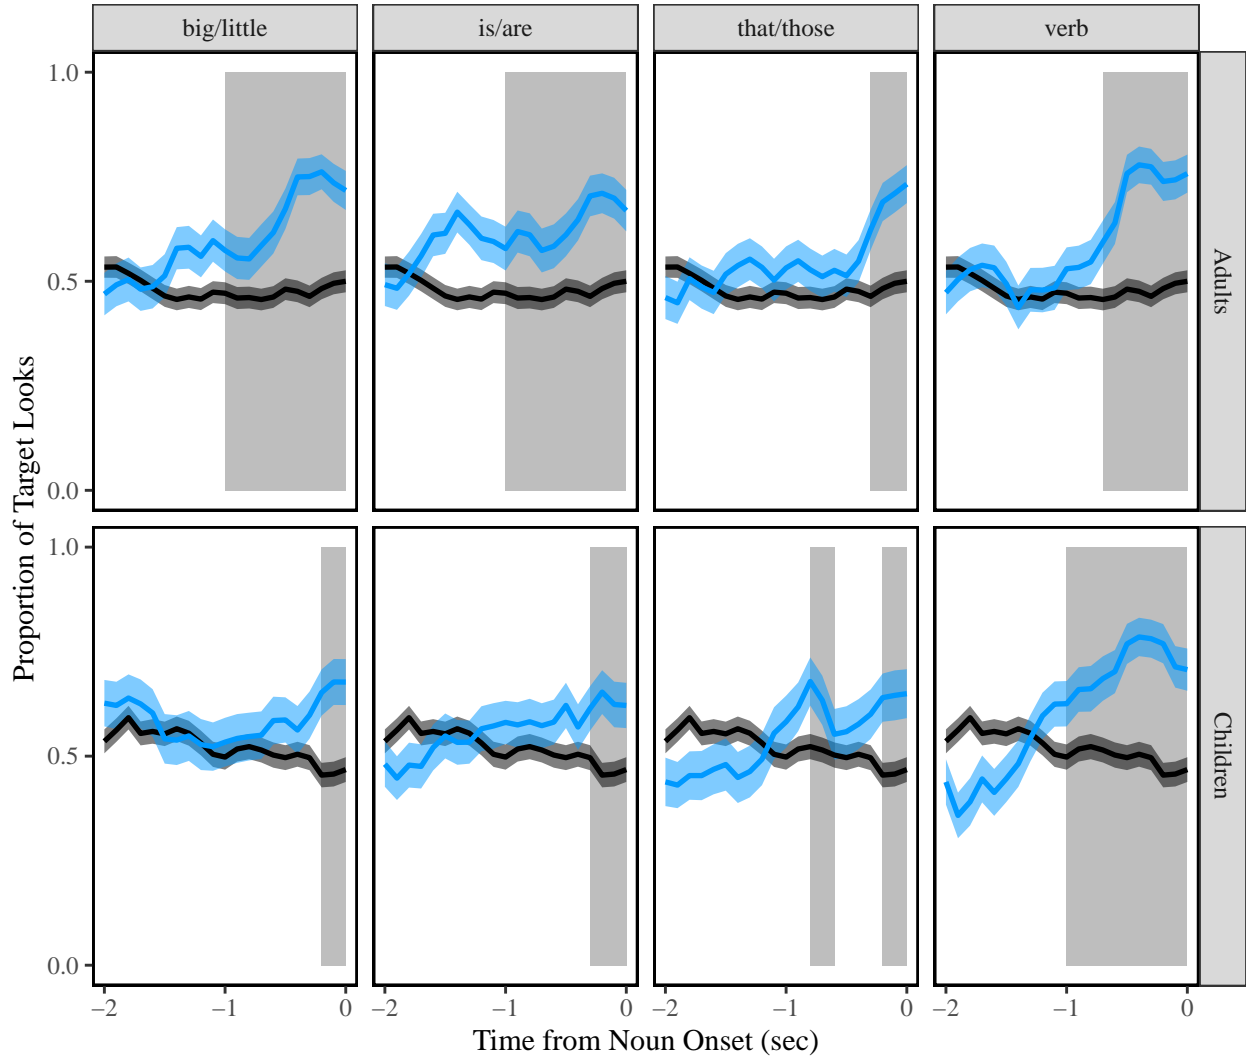

## Results by Halves

As part of our response to reviewers, we conducted a post-hoc analysis of results by the first vs. second halves of trials.

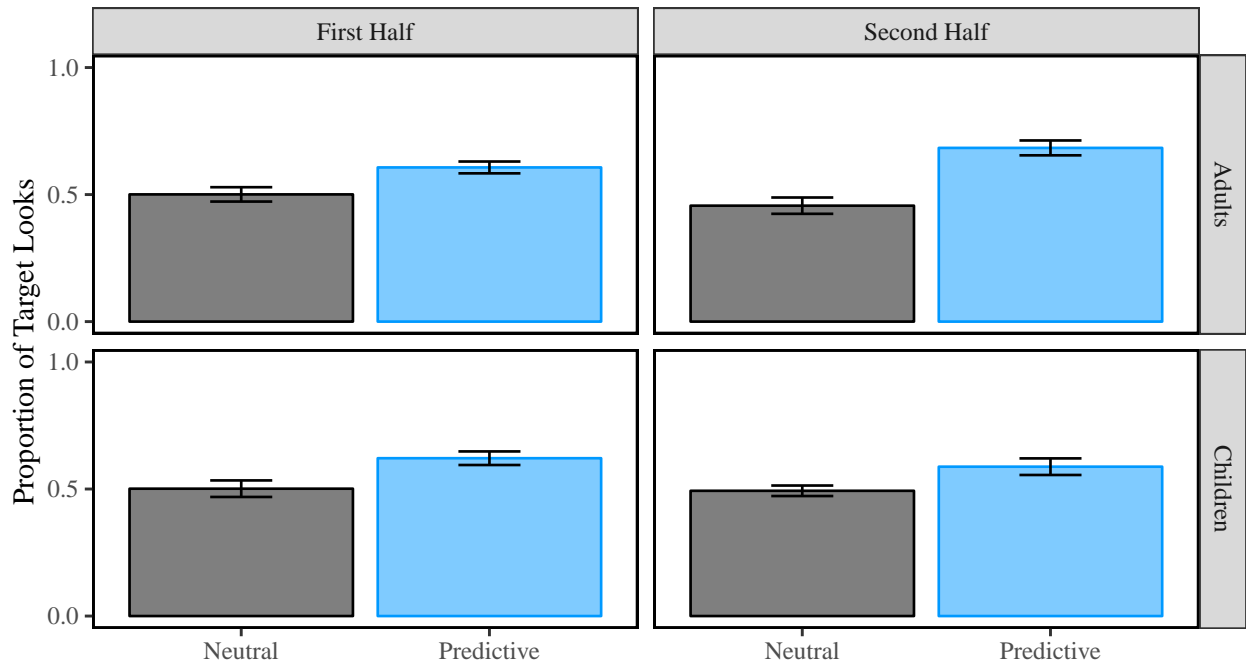

| term                   | estimate | statistic | p.value | sig |
|------------------------|----------|-----------|---------|-----|
| Intercept              | 0.381    | 2.82      | 0.013   | *   |
| Half                   | 0.002    | 0.03      | 0.975   |     |
| Condition              | -0.487   | -7.12     | < 0.001 | *   |
| Age                    | 0.011    | 0.16      | 0.873   |     |
| Half x Condition       | 0.027    | 0.37      | 0.712   |     |
| Half x Age             | -0.078   | -1.14     | 0.256   |     |
| Condition x Age        | -0.093   | -1.35     | 0.176   |     |
| Half x Condition x Age | 0.103    | 1.50      | 0.134   |     |

For adults, we find:

| term             | estimate | statistic | p.value | sig |
|------------------|----------|-----------|---------|-----|
| Intercept        | 0.399    | 1.97      | 0.065   |     |
| Half             | -0.046   | -0.47     | 0.638   |     |
| Condition        | -0.579   | -6.26     | < 0.001 | *   |
| Half x Condition | 0.168    | 1.67      | 0.095   |     |

For children, we find:

| term             | estimate | statistic | p.value | sig |
|------------------|----------|-----------|---------|-----|
| Intercept        | 0.366    | 2.66      | 0.018   | *   |
| Half             | 0.045    | 0.44      | 0.657   |     |
| Condition        | -0.398   | -4.06     | < 0.001 | *   |
| Half x Condition | -0.079   | -0.77     | 0.444   |     |

## Results by First Predictive Occurrence

As part of our response to reviewers, we conducted a post-hoc analysis of results by the first occurrence of a yoked pair of stimuli in the predictive condition. (Grey shading indicates significant clusters from permutation analyses.)

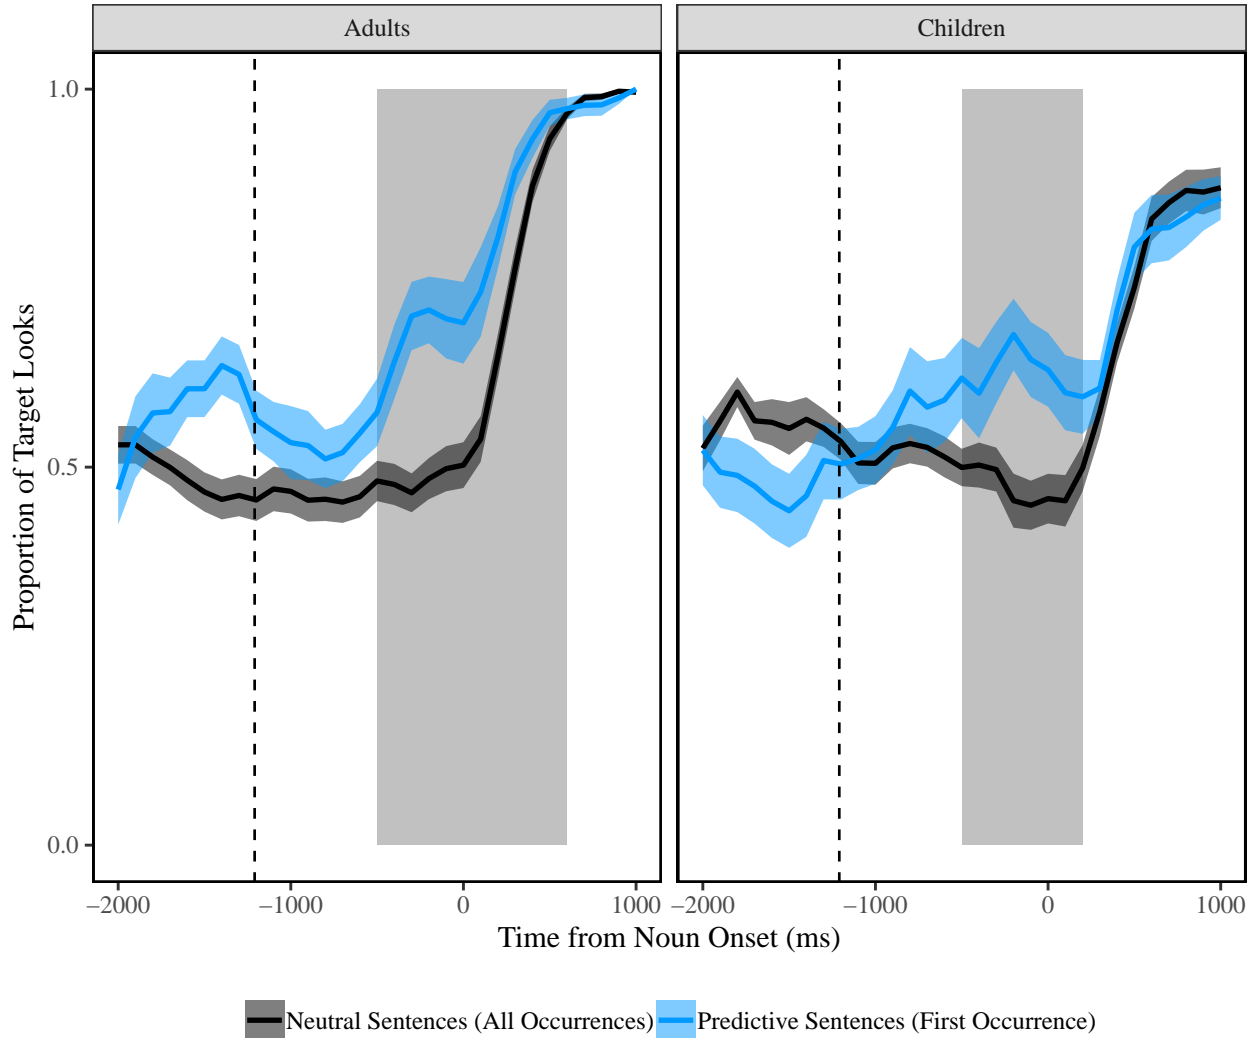

# Results by Chronological Trial

As part of our response to reviewers, we conducted a post-hoc analysis of results by chronological trial order.

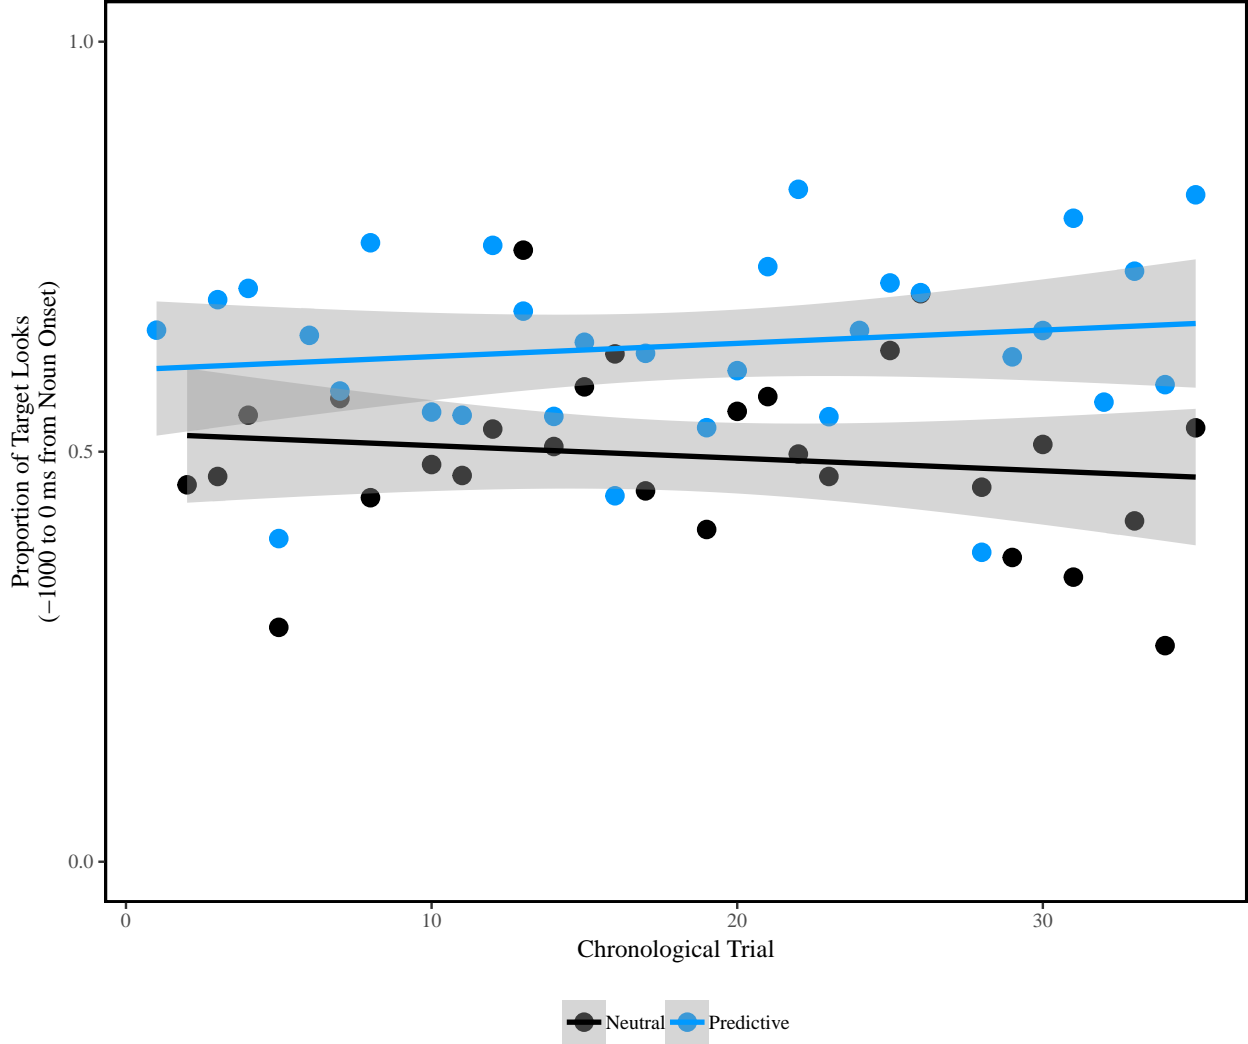

## Experiment 3

### Mixed Effects Models

As in Experiments 1 and 2, the omnibus mixed effects model includes an interaction of age (adults vs. children), condition (predictive vs. neutral), and time (-1000 to 1000 ms from noun onset; 100 ms time-bins), with random intercepts for subjects and for items. We find. . .

| term                   | estimate | statistic | p.value | sig |
|------------------------|----------|-----------|---------|-----|
| Intercept              | -0.178   | -0.71     | 0.497   |     |
| Condition              | -0.088   | -4.59     | < 0.001 | *   |
| Age                    | 0.377    | 5.16      | < 0.001 | *   |
| Time                   | 2.427    | 76.45     | < 0.001 | *   |
| Condition x Age        | 0.030    | 1.56      | 0.119   |     |
| Condition x Time       | 0.057    | 1.79      | 0.074   |     |
| Age x Time             | 0.359    | 11.30     | < 0.001 | *   |
| Condition x Age x Time | 0.058    | 1.84      | 0.066   |     |

For adults, we find:

| term             | estimate | statistic | p.value | sig |
|------------------|----------|-----------|---------|-----|
| Intercept        | 0.198    | 1.00      | 0.336   |     |
| Condition        | -0.058   | -2.44     | 0.015   | *   |
| Time             | 2.786    | 70.70     | < 0.001 | *   |
| Condition x Time | 0.115    | 2.93      | 0.003   | *   |

For children, we find: (Note, the maximal model for children - including random intercepts for both subjects and items - failed to converge. We therefore reduced the random effects structure and compared model fits, with the final model including only random intercepts for items.)

| term             | estimate | statistic | p.value | sig |
|------------------|----------|-----------|---------|-----|
| Intercept        | -0.554   | -1.63     | 0.147   |     |
| Condition        | -0.123   | -3.98     | < 0.001 | *   |
| Time             | 2.060    | 40.45     | < 0.001 | *   |
| Condition x Time | 0.005    | 0.10      | 0.923   |     |

## Cluster-Based Permutation Analyses

As in Experiments 1 and 2, we used cluster-based permutation analyses to further evaluate looking behavior. The below tables summarize results for adults and children, respectively.

| start | end  | cluster.stat | pval  |
|-------|------|--------------|-------|
| -300  | -100 | 4.920749     | 0.027 |

| start | end | cluster.stat | pval  |
|-------|-----|--------------|-------|
| -200  | 0   | 5.838534     | 0.005 |

## Results by Age Group

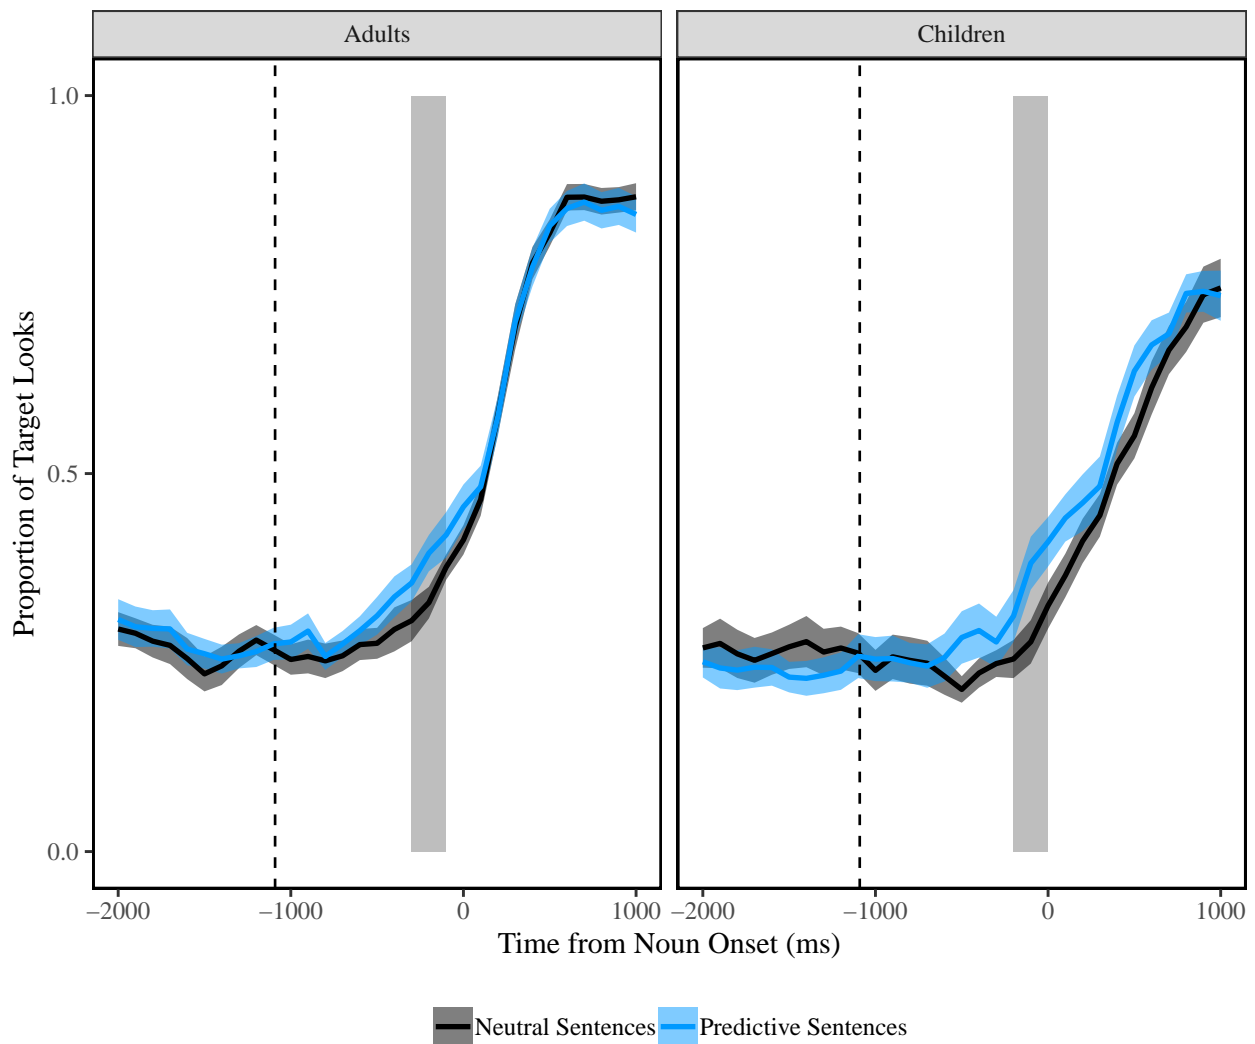

## Mixed Effects Models by Predictive Cue

| term             | estimate | statistic | p.value | sig | age.group | comparison |
|------------------|----------|-----------|---------|-----|-----------|------------|
| Intercept        | -0.922   | -3.38     | 0.004   | *   | Adults    | verb       |
| Conditon         | 2.031    | 11.52     | < 0.001 | *   | Adults    | verb       |
| Time             | 1.101    | 6.61      | < 0.001 | *   | Adults    | verb       |
| Condition x Time | 2.256    | 7.58      | < 0.001 | *   | Adults    | verb       |
| Intercept        | -0.926   | -3.83     | 0.001   | *   | Adults    | is/are     |
| Conditon         | 0.072    | 0.41      | 0.681   |     | Adults    | is/are     |
| Time             | 1.101    | 6.51      | < 0.001 | *   | Adults    | is/are     |
| Condition x Time | -0.404   | -1.36     | 0.173   |     | Adults    | is/are     |
| Intercept        | -0.920   | -3.06     | 0.008   | *   | Adults    | that/those |
| Conditon         | 0.307    | 1.80      | 0.073   |     | Adults    | that/those |
| Time             | 1.101    | 6.75      | < 0.001 | *   | Adults    | that/those |
| Condition x Time | 0.266    | 0.92      | 0.358   |     | Adults    | that/those |
| Intercept        | -0.922   | -4.09     | < 0.001 | *   | Adults    | big/little |
| Conditon         | -0.710   | -4.11     | < 0.001 | *   | Adults    | big/little |
| Time             | 1.101    | 6.70      | < 0.001 | *   | Adults    | big/little |
| Condition x Time | -1.081   | -3.70     | < 0.001 | *   | Adults    | big/little |
| Intercept        | -1.593   | -4.33     | 0.001   | *   | Children  | verb       |
| Conditon         | 2.240    | 10.65     | < 0.001 | *   | Children  | verb       |
| Time             | 0.384    | 2.02      | 0.043   | *   | Children  | verb       |
| Condition x Time | 2.366    | 6.68      | < 0.001 | *   | Children  | verb       |
| Intercept        | -1.613   | -4.50     | 0.001   | *   | Children  | is/are     |
| Conditon         | -0.275   | -1.40     | 0.162   |     | Children  | is/are     |
| Time             | 0.373    | 2.08      | 0.038   | *   | Children  | is/are     |
| Condition x Time | 0.105    | 0.32      | 0.751   |     | Children  | is/are     |
| Intercept        | -1.602   | -4.22     | 0.002   | *   | Children  | that/those |
| Conditon         | 0.250    | 1.17      | 0.243   |     | Children  | that/those |
| Time             | 0.369    | 1.97      | 0.049   | *   | Children  | that/those |
| Condition x Time | -0.198   | -0.55     | 0.583   |     | Children  | that/those |
| Intercept        | -1.616   | -4.37     | 0.002   | *   | Children  | big/little |
| Conditon         | 0.386    | 1.86      | 0.062   |     | Children  | big/little |
| Time             | 0.370    | 2.02      | 0.044   | *   | Children  | big/little |
| Condition x Time | 0.740    | 2.12      | 0.034   | *   | Children  | big/little |



## Results by Predictive Cue

(Grey shading indicates significant clusters from permutation analyses.)

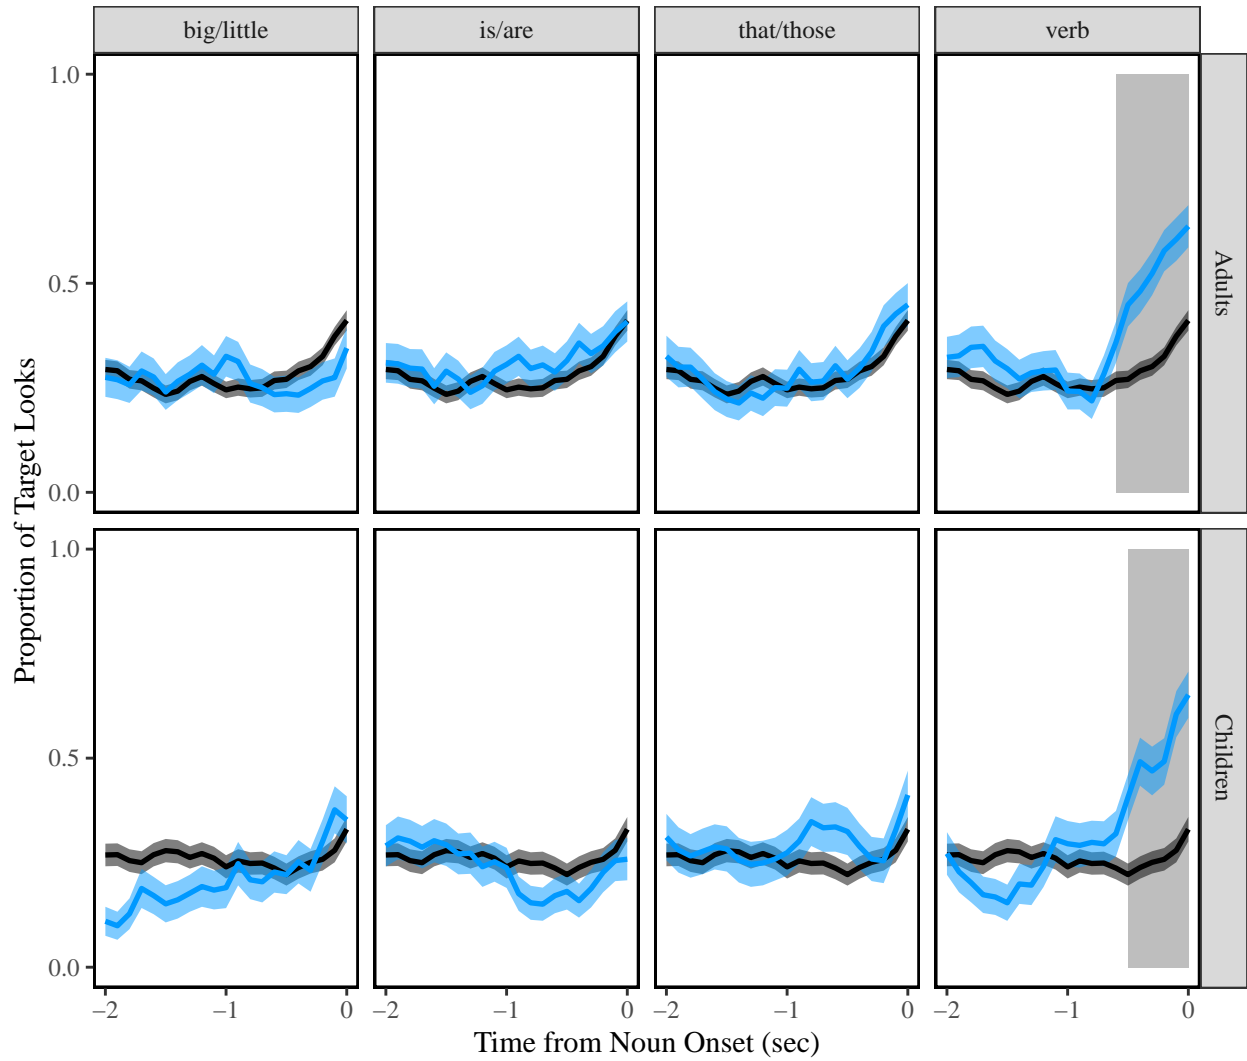

## Experiment 2 Results vs. Experiment 3 Results

lmer to compare effect (predictive minus neutral) across experiments

| term                          | estimate | statistic | p.value | sig |
|-------------------------------|----------|-----------|---------|-----|
| Intercept                     | 0.892    | 13.86     | < 0.001 | *   |
| Condition                     | 0.511    | 12.58     | < 0.001 | *   |
| Time                          | 1.797    | 37.87     | < 0.001 | *   |
| Experiment                    | -1.048   | -25.29    | < 0.001 | *   |
| Condition x Time              | -0.291   | -4.34     | < 0.001 | *   |
| Condition x Experiment        | -0.378   | -6.57     | < 0.001 | *   |
| Time x Experiment             | -0.039   | -0.58     | 0.559   |     |
| Condition x Time x Experiment | 0.267    | 2.82      | 0.005   | *   |
